# Supplementary material
Source: publisher figshare collection journal article supplement (https://karger.figshare.com/articles/dataset/_/5127940)
Supplement: Supplementary file 1 [file 1]

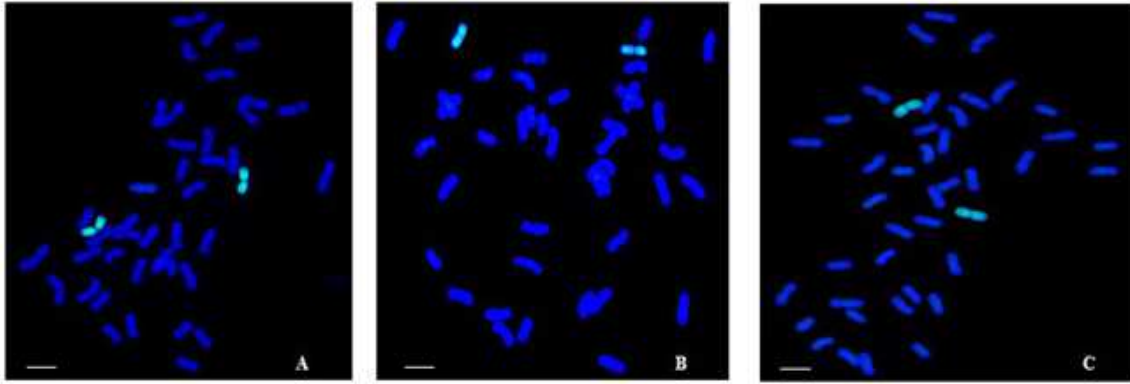

Figure S1 Genomic *in situ* hybridization (GISH) analysis of wheat-*Thinopyrum* substitution lines, (A) 7el<sub>1</sub>(7D), (B) 7el<sub>2</sub>(7D) and (C) 7E<sup>c</sup>(7D) using “Chinese Spring” genomic DNA as the block DNA.

(A), (B) *Th. ponticum* genomic DNA as the probe;

(C) *Th. elongatum* genomic DNA as the probe.

Bars, 10  $\mu$ m.
